# Supplementary material for: A genetic selection reveals functional metastable structures embedded in a toxin-encoding mRNA
Source: eLife. 2019 Aug 14;8:e47549. doi: 10.7554/eLife.47549 (PMC6733600; doi:10.7554/eLife.47549)
Supplement: Figure 3—source data 1. [file elife-47549-fig3-data1.xlsx]

## Sheet: Biological replicate 1
	Plated volume (ul)	Non-selective media			Selective media (+ streptomycin)
		Dilution	Number of colonies	CFU/ml	Dilution	Number of colonies	CFU/ml	StrepR	Mean	SD	Error
H2O
	100	1e-05	7300	7.3e+09	0.01	190	190000	2.60274e-05
	100	1e-06	874	8740000000	0.001	13	130000	1.48741e-05	1.66641e-05	8.60896e-06	0.00137661
	100	1e-07	110	11000000000	0.0001	1	100000	9.09091e-06
WT
	100	1e-05	7900	7.9e+09	0.01	uncountable
	100	1e-06	850	8500000000	0.001	4750	47500000	0.00558824	0.00486143	0.00102786	0.000495276
	100	1e-07	104	10400000000	0.0001	430	43000000	0.00413462
start
	100	1e-05	7950	7.95e+09	0.01	uncountable
	100	1e-06	877	8770000000	0.001	4648	46480000	0.00529989	0.004671	0.000889385	0.0298255
	100	1e-07	95	9500000000	0.0001	384	38400000	0.00404211
start/ pIsoA3*
	100	1e-05	8100	8.1e+09	0.01	uncountable
	100	1e-06	846	8460000000	0.001	4648	46480000	0.00549409	0.00470623	0.0011142	0.000514616
	100	1e-07	98	9800000000	0.0001	384	38400000	0.00391837
pIsoA3*
	100	1e-05	8090	8.09e+09	0.01	615	615000	7.60198e-05
	100	1e-06	876	8760000000	0.001	63	630000	7.19178e-05	7.19663e-05	4.02952e-06	0.0687368
	100	1e-07	103	10300000000	0.0001	7	700000	6.79612e-05

## Sheet: Biological replicate 2
	Plated volume (ul)	Non-selective media			Selective media (+ streptomycin)
		Dilution	Number of colonies	CFU/ml	Dilution	Number of colonies	CFU/ml	StrepR	Mean	SD	Error
H2O
	100	1e-05	6180	6.18e+09	0.01	212	212000	3.43042e-05
	100	1e-06	703	7030000000	0.001	26	260000	3.69844e-05	3.14257e-05	7.42868e-06	0.00137661
	100	1e-07	87	8700000000	0.0001	2	200000	2.29885e-05
WT
	100	1e-05	6450	6.45e+09	0.01	uncountable
	100	1e-06	787	7870000000	0.001	3500	35000000	0.00444727	0.00417766	0.000381288	0.000495276
	100	1e-07	87	8700000000	0.0001	340	34000000	0.00390805
start
	100	1e-05	6300	6.3e+09	0.01	uncountable
	100	1e-06	745	7450000000	0.001	3740	37400000	0.00502013	0.00463216	0.000548678	0.0298255
	100	1e-07	86	8600000000	0.0001	365	36500000	0.00424419
start/ pIsoA3*
	100	1e-05	6200	6.2e+09	0.01	uncountable
	100	1e-06	757	7570000000	0.001	3950	39500000	0.00521797	0.00476629	0.000638771	0.000514616
	100	1e-07	89	8900000000	0.0001	384	38400000	0.00431461
pIsoA3*
	100	1e-05	6900	6.9e+09	0.01	682	682000	9.88406e-05
	100	1e-06	764	7640000000	0.001	54	540000	7.06806e-05	6.38331e-05	3.88861e-05	0.0687368
	100	1e-07	91	9100000000	0.0001	2	200000	2.1978e-05

## Sheet: Biological replicate 3
	Plated volume (ul)	Non-selective media			Selective media (+ streptomycin)
		Dilution	Number of colonies	CFU/ml	Dilution	Number of colonies	CFU/ml	StrepR	Mean	SD	Error
H2O
	100	1e-05	2180	2180000000	0.01	1000	100000	4.58716e-05
	100	1e-06	240	2400000000	0.001	164	164000	6.83333e-05	5.42845e-05	1.22456e-05	0.00137661
	100	1e-07	37	3700000000	0.0001	18	180000	4.86486e-05
WT
	100	1e-05	3600	3.6e+09	0.01	uncountable
	100	1e-06	480	4800000000	0.001	6200	6200000	0.00129167	0.00113113	0.000227037	0.000495276
	100	1e-07	68	6800000000	0.0001	660	6600000	0.000970588
start
	100	1e-05	3120	3.12e+09	0.01	uncountable
	100	1e-06	480	4800000000	0.001	6080	6080000	0.00126667	0.00124048	3.70389e-05	0.0298255
	100	1e-07	56	5600000000	0.0001	680	6800000	0.00121429
start/ pIsoA3*
	100	1e-05	3720	3.72e+09	0.01	uncountable
	100	1e-06	392	3920000000	0.001	5920	5920000	0.0015102	0.00127123	0.000337959	0.000514616
	100	1e-07	62	6200000000	0.0001	640	6400000	0.00103226
pIsoA3*
	100	1e-05	3540	3.54e+09	0.01	2900	290000	8.19209e-05
	100	1e-06	392	3920000000	0.001	328	328000	8.36735e-05	7.75791e-05	9.08041e-06	0.0687368
	100	1e-07	70	7000000000	0.0001	47	470000	6.71429e-05

## Sheet: StrR mean and SD
	Bio. R1	Bio. R2	Bio. R3	Mean	SD
H2O	1.66641e-05	3.14257e-05	5.42845e-05	3.41248e-05	1.89549e-05
WT	0.00113113	0.00417766	0.00486143	0.00339007	0.00198595
start	0.004671	0.00463216	0.00124048	0.00351454	0.0019695
start/ pIsoA3*	0.00470623	0.00476629	0.00127123	0.00358125	0.00200076
pIsoA3*	7.19663e-05	7.75791e-05	6.38331e-05	7.11261e-05	6.9114e-06
