# Supplementary material for: A genetic selection reveals functional metastable structures embedded in a toxin-encoding mRNA
Source: eLife. 2019 Aug 14;8:e47549. doi: 10.7554/eLife.47549 (PMC6733600; doi:10.7554/eLife.47549)
Supplement: Figure 4—figure supplement 2—source data 1. [file elife-47549-fig4-figsupp2-data1.xlsx]

## Sheet: Feuil1
	Replicate 1				Replicate 2				Replicate 3
		Adj. Vol. (int)	Relative substrate band intensity			Adj. Vol. (int)	Relative substrate band intensity			Adj. Vol. (int)	Relative substrate band intensity
	C	84178.7	6.34705		C	54063.9	5.5849		C	24839.7	6.21535
	WT-FL	57201	4.31293		WT-FL	47923.5	4.95058		WT-FL	40367.4	10.1007
	WT-Tr	1.32627e+06	100		WT-Tr	968038	100		WT-Tr	399651	100
	A28C-Tr	293606	22.1378		A28C-Tr	156603	16.1774		A28C-Tr	126625	31.6838
	A40T-Tr	120283	9.06933		A40T-Tr	138932	14.3519		A40T-Tr	99141.6	24.8071
	T78C-Tr	566573	42.7194		T78C-Tr	92726.2	9.57878		T78C-Tr	81991.4	20.5157
