# Supplementary material for: A genetic selection reveals functional metastable structures embedded in a toxin-encoding mRNA
Source: eLife. 2019 Aug 14;8:e47549. doi: 10.7554/eLife.47549 (PMC6733600; doi:10.7554/eLife.47549)
Supplement: Figure 5—source data 1. [file elife-47549-fig5-data1.xlsx]

## Sheet: Biological replicate 1
	Plated volume (ul)	Non-selective media			Selective media (+ streptomycin)
		Dilution	Number of colonies	CFU/ml	Dilution	Number of colonies	CFU/ml	StrepR	Average	SD	Error
H2O
	100	1e-05	7985	7990000000	0.01	200	200000	2.5e-05
	100	1e-06	790	7900000000	0.001	54	540000	6.84e-05	4.09e-05	2.38884e-05	0.00137661
	100	1e-07	102	10200000000	0.0001	3	300000	2.94e-05
33 A>T
	100	1e-05	8100	8100000000	0.01	980	980000	0.000121
	100	1e-06	854	8540000000	0.001	99	990000	0.000116	0.0001232	8.73689e-06	0.000495276
	100	1e-07	98	9800000000	0.0001	13	1300000	0.000133
40 A>T
	100	1e-05	7545	7550000000	0.01	uncountable
	100	1e-06	810	8100000000	0.001	8120	81200000	0.001	0.0096594	5.02046e-05	0.0298255
	100	1e-07	85	8500000000	0.0001	790	79000000	0.000929
33 A>T/ 40 A>T
	100	1e-05	6900	6900000000	0.01	750	750000	0.000109
	100	1e-06	715	7150000000	0.001	65	650000	9.09e-05	9.95e-05	9.07432e-06	0.000514616
	100	1e-07	81	8100000000	0.0001	8	800000	9.88e-05
33 A>T/ 40 A>T/ pIsoA3*
	100	1e-05	7600	7600000000	0.01	uncountable
	100	1e-06	695	6950000000	0.001	6850	68500000	0.009	0.0090143	0.000586899	0.0687368
	100	1e-07	87	8700000000	0.0001	711	71100000	0.00817

## Sheet: Biological replicate 2
	Plated volume (ul)	Non-selective media			Selective media (+ streptomycin)
		Dilution	Number of colonies	CFU/ml	Dilution	Number of colonies	CFU/ml	StrepR	Average	SD	Error
H2O
	100	1e-05	8100	8.1e+09	0.01	185	185000	2.28395e-05
	100	1e-06	845	8450000000	0.001	32	320000	3.78698e-05	2.83665e-05	8.26654e-06	0.00137661
	100	1e-07	82	8200000000	0.0001	2	200000	2.43902e-05
33 A>T
	100	1e-05	7985	7.985e+09	0.01	865	865000	0.000108328
	100	1e-06	720	7200000000	0.001	79	790000	0.000109722	0.0001232	2.34116e-05	0.000495276
	100	1e-07	73	7300000000	0.0001	5	500000	6.84932e-05
40 A>T
	100	1e-05	7900	7.9e+09	0.01	uncountable
	100	1e-06	820	8200000000	0.001	7600	76000000	0.00926829	0.0096594	0.000355576	0.0298255
	100	1e-07	81	8100000000	0.0001	710	71000000	0.00876543
33 A>T/ 40 A>T
	100	1e-05	7350	7.35e+09	0.01	680	680000	9.2517e-05
	100	1e-06	695	6950000000	0.001	71	710000	0.000102158	9.95e-05	1.68102e-05	0.000514616
	100	1e-07	72	7200000000	0.0001	5	500000	6.94444e-05
33 A>T/ 40 A>T/ pIsoA3*
	100	1e-05	8000	8e+09	0.01	uncountable
	100	1e-06	795	7950000000	0.001	6320	63200000	0.00794969	0.0090143	0.00040407	0.0687368
	100	1e-07	71	7100000000	0.0001	605	60500000	0.00852113

## Sheet: Biological replicate 3
	Plated volume (ul)	Non-selective media			Selective media (+ streptomycin)
		Dilution	Number of colonies	CFU/ml	Dilution	Number of colonies	CFU/ml	StrepR	Average	SD	Error
H2O
	100	1e-05	7200	7.2e+09	0.01	160	160000	2.22222e-05
	100	1e-06	715	7150000000	0.001	17	170000	2.37762e-05	2.01637e-05	4.9723e-06	0.00137661
	100	1e-07	69	6900000000	0.0001	1	100000	1.44928e-05
33 A>T
	100	1e-05	7550	7.55e+09	0.01	754	754000	9.98675e-05
	100	1e-06	735	7350000000	0.001	68	680000	9.2517e-05	0.0001232	9.46698e-06	0.000495276
	100	1e-07	74	7400000000	0.0001	6	600000	8.10811e-05
40 A>T
	100	1e-05	7700	7.7e+09	0.01	uncountable
	100	1e-06	760	7600000000	0.001	7200	72000000	0.00947368	0.0096594	0.000372161	0.0298255
	100	1e-07	5	500000000	0.0001	680	68000000	0.01
33 A>T/ 40 A>T
	100	1e-05	6900	6.9e+09	0.01	640	640000	9.27536e-05
	100	1e-06	680	6800000000	0.001	63	630000	9.26471e-05	9.95e-05	9.10916e-06	0.000514616
	100	1e-07	65	6500000000	0.0001	5	500000	7.69231e-05
33 A>T/ 40 A>T/ pIsoA3*
	100	1e-05	7800	7.8e+09	0.01	uncountable
	100	1e-06	770	7700000000	0.001	6800	68000000	0.00883117	0.0090143	0.000384547	0.0687368
	100	1e-07	72	7200000000	0.0001	675	67500000	0.009375
