# Supplementary material for: A genetic selection reveals functional metastable structures embedded in a toxin-encoding mRNA
Source: eLife. 2019 Aug 14;8:e47549. doi: 10.7554/eLife.47549 (PMC6733600; doi:10.7554/eLife.47549)
Supplement: Figure 5—source data 2. [file elife-47549-fig5-data2.xlsx]

## Sheet: Feuil1
Sum-up
μM oligo	WT-Tr		40 A>T-Tr		28 A>C		33 A>T/ 40 A>T/start
	R1	R2	R1	R2	R1	R2	R1	R2
0	100	100	100	100	100	100	100	100
1	23.8632	7.76139	70.5972	57.4145	80.0012	78.6043	3.67932	7.09507
2	11.5975	5.88175	58.8902	43.3352	54.8068	52.4903	3.11404	3.98489
5	3.95658	2.3525	42.9294	31.6636	24.1879	25.6021	1.93845	3.64232
10	3.73036	2.25226	38.3718	23.6964	17.7292	18.5288	2.09309	2.63262
	0.03 pmol 33 A>T/ 40 A>T replicate 1						0.03 pmol 33 A>T/ 40 A>T replicate 2
pmol FA651	Substrate	P1				pmol FA651	Substrate	P1
0	4076646	13137	4089783			0	3251973	8439	3260412
1	137634	3460947	3598581			1	209757	2670552	2880309
2	110142	3300519	3410661			2	122061	2842986	2965047
5	80388	3866802	3947190			5	109185	2830023	2939208
10	89784	3988776	4078560			10	75690	2685081	2760771
C	1311198	7917	1319115			C	3131478	3828	3135306
pmol FA651	Substrate	P1	Relative substrate band intensity			pmol FA651	Substrate	P1	Relative substrate band intensity
0	99.6788	0.321215	100			0	99.7412	0.258832	100
1	3.82467	96.1753	3.837			1	7.28245	92.7176	7.30135
2	3.22934	96.7707	3.23975			2	4.11666	95.8833	4.12735
5	2.03659	97.9634	2.04315			5	3.71478	96.2852	3.72442
10	2.20137	97.7986	2.20846			10	2.74163	97.2584	2.74874
C	99.3998	0.600175	99.7201			C	99.8779	0.122093	100.137
		0.03 pmol 28 A>C replicate 1						0.03 pmol 28 A>C replicate 2
pmol FA652	Substrate	P1				pmol FA652	Substrate	P1
0	2874550	5676	2880226			0	1482812	1118	1483930
1	1878326	473086	2351412			1	1202710	260666	1463376
2	1322164	1092372	2414536			2	850970	315706	1166676
5	573276	1751734	2325010			5	844090	787330	1631420
10	386742	1738060	2124802			10	450554	1007404	1457958
C	2564434	3440	2567874			C	1393114	1720	1394834
pmol FA652	Substrate	P1	Relative substrate band intensity			pmol FA652	Substrate	P1	Relative substrate band intensity
0	99.8029	0.197068	100			0	99.9247	0.0753405	100
1	79.8808	20.1192	80.0385			1	82.1874	17.8126	82.2493
2	54.7585	45.2415	54.8666			2	72.9397	27.0603	72.9947
5	24.6569	75.3431	24.7056			5	51.7396	48.2604	51.7786
10	18.2013	81.7987	18.2373			10	30.9031	69.0969	30.9264
C	99.866	0.133963	100.063			C	99.8767	0.123312	99.952
		0.03 pmol 40 A>T Tr replicate 1						0.03 pmol 40 A>T Tr replicate 2
pmol FA644	Substrate	P1				pmol FA644	Substrate	P1
0	640528	172	640700			0	437568	1634	439202
1	393622	164088	557710			1	330154	238822	568976
2	310374	216806	527180			2	239252	304182	543434
5	260580	346580	607160			5	178364	373584	551948
10	202960	326112	529072			10	130462	404372	534834
C	659276	1978	661254			C	228760	602	229362
pmol FA644	Substrate	P1	Relative substrate band intensity			pmol FA644	Substrate	P1	Relative substrate band intensity
0	99.9732	0.0268456	100			0	99.5305	0.371674	100
1	70.5783	29.4217	70.5972			1	57.145	41.3367	57.4145
2	58.8744	41.1256	58.8902			2	43.1318	54.8372	43.3352
5	42.9178	57.0822	42.9294			5	31.515	66.0082	31.6636
10	38.3615	61.6385	38.3718			10	23.5852	73.1032	23.6964
C	99.7009	0.299129	99.7276			C	99.6628	0.262271	100.133
	0.03 pmol WT-Tr replicate 1						0.03 pmol WT-Tr replicate 2
pmol FA644	Substrate	P1				pmol FA644	Substrate	P1
0	373240	2064	375304			0	377970	11094	389064
1	100190	321984	422174			1	31992	377626	409619
2	47988	368080	416068			2	28274	441954	470230
5	17028	415724	432752			5	9202	375562	384769
10	15394	399556	414950			10	9718	411080	420808
C	460014	6880	466894			C	539306	14018	553324
pmol FA644	Substrate	P1	Relative substrate band intensity			pmol FA644	Substrate	P1	Relative substrate band intensity
0	99.45	0.549954	100			0	97.1485	2.85146	100
1	23.7319	76.2681	23.8632			1	7.8102	92.1898	8.03945
2	11.5337	88.4663	11.5975			2	6.01283	93.9872	6.18931
5	3.93482	96.0652	3.95658			5	2.3916	97.6084	2.46179
10	3.70984	96.2902	3.73036			10	2.30942	97.6906	2.37721
C	98.5264	1.47357	99.0713			C	97.4666	2.53342	100.327
