# Supplementary material for: A genetic selection reveals functional metastable structures embedded in a toxin-encoding mRNA
Source: eLife. 2019 Aug 14;8:e47549. doi: 10.7554/eLife.47549 (PMC6733600; doi:10.7554/eLife.47549)
Supplement: Figure 6—source data 1. [file elife-47549-fig6-data1.xlsx]

## Sheet: Feuil1
Sum-up
μM oligo	WT-Tr		78 T>C-Tr		WT-FL
	R1	R2	R1	R2	R1	R2
0	100	100	100	100	100	100
1	28.9264	40.8243	81.9863	85.9283	96.2803	99.6309
2	8.26083	19.6846	74.1441	79.8201	96.0524	99.0249
5	2.21279	4.0658	66.201	72.4705	94.3935	97.6546
10	1.18212	1.43862	66.3341	69.8823	94.0309	95.555
	0.03 pmol 78T>C-Tr replicate 1						0.03 pmol 78T>C-Tr replicate 2
pmol FA633	Substrate	P1				pmol FA633	Substrate	P1
0	5571544	12056	5583600			0	12995804	18662	13014466
1	5050320	1122968	6173288			1	10527002	1741500	12268502
2	4229280	1487200	5716480			2	10175090	2590750	12765840
5	4352392	2236344	6588736			5	10370138	3959870	14330008
10	4358112	2226048	6584160			10	10610766	4594808	15205574
C	4991360	8096	4999456			C	12603816	62264	12666080
pmol FA633	Substrate	P1	Relative substrate band intensity			pmol FA633	Substrate	P1	Relative substrate band intensity
0	99.7841	0.215918	100			0	99.8566	0.143394	100
1	81.8092	18.1908	81.9863			1	85.8051	14.1949	85.9283
2	73.984	26.016	74.1441			2	79.7056	20.2944	79.8201
5	66.0581	33.9419	66.201			5	72.3666	27.6334	72.4705
10	66.1909	33.8091	66.3341			10	69.7821	30.2179	69.8823
C	99.8381	0.161938	100.054			C	99.5084	0.491581	99.6513
	0.03 pmol WT-Tr replicate 1						0.03 pmol WT-Tr replicate 2
pmol FA633	Substrate	P1				pmol FA633	Substrate	P1
0	4673064	37488	4710552			0	9717656	17114	9734770
1	1199704	2981000	4180704			1	3371716	4901914	8273630
2	433400	4855136	5288536			2	2205212	9017272	11222484
5	130328	5806680	5937008			5	456058	10780616	11236674
10	59752	5035448	5095200			10	154198	10583160	10737358
C	6329136	30800	6359936			C	12099684	108274	12207958
pmol FA633	Substrate	P1	Relative substrate band intensity			pmol FA633	Substrate	P1	Relative substrate band intensity
0	99.2042	0.79583	100			0	99.8242	0.175803	100
1	28.6962	71.3038	28.9264			1	40.7526	59.2474	40.8243
2	8.19508	91.8049	8.26083			2	19.6499	80.3501	19.6846
5	2.19518	97.8048	2.21279			5	4.05866	95.9413	4.0658
10	1.17271	98.8273	1.18212			10	1.43609	98.5639	1.43862
C	99.5157	0.484282	100.314			C	99.1131	0.886913	99.2876
	0.03 pmol WT-FL replicate 1						0.03 pmol WT-FL replicate 2
pmol FA633	Substrate	P1				pmol FA633	Substrate	P1
0	2346876	756	2347632			0	2120850	810	2121660
1	2209452	86100	2295552			1	1630890	6570	1637460
2	2298996	95256	2394252			2	2167650	22050	2189700
5	2562084	153048	2715132			5	2350980	57240	2408220
10	2369052	151200	2520252			10	2310750	108270	2419020
C	2714544	27216	2741760			C	2721600	18900	2740500
pmol FA633	Substrate	P1	Relative substrate band intensity			pmol FA633	Substrate	P1	Relative substrate band intensity
0	99.9678	0.0322027	100			0	99.9618	0.0381777	100
1	96.2493	3.75073	96.2803			1	99.5988	0.401231	99.6309
2	96.0215	3.97853	96.0524			2	98.993	1.00699	99.0249
5	94.3631	5.63685	94.3935			5	97.6231	2.37686	97.6546
10	94.0006	5.9994	94.0309			10	95.5242	4.47578	95.555
C	99.0074	0.992647	99.0392			C	99.3103	0.689655	99.3423
