# Supplementary material for: A genetic selection reveals functional metastable structures embedded in a toxin-encoding mRNA
Source: eLife journal article supplement (doi:10.7554/elife.47549), 2019-08-14
Supplement: supp [file elife-47549-supp-v1.zip]

Figure 8 - figure supplement 1B

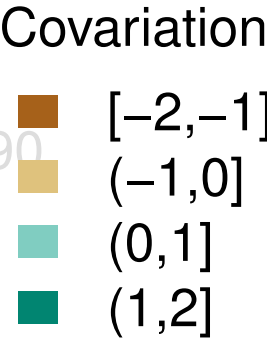

Metastable structure 2

TA00126 AapA3 Helicobacter pylori 26695 chromosome  
TA00026 AapA3 Helicobacter acinonychis\_str. Sheeba Sheeba.  
TA00083 AapA4 Helicobacter pylori 35A  
TA00316 AapA4 Helicobacter pylori OK310 DNA  
TA00197 AapA4 Helicobacter pylori Cuz20  
TA00411 AapA3 Helicobacter pylori Shi169  
TA00413 AapA4 Helicobacter pylori Shi169  
TA00417 AapA4 Helicobacter pylori Shi417  
TA00366 AapA4 Helicobacter pylori PeCan4  
TA00453 AapA4 Helicobacter pylori UM032  
TA00472 AapA4 Helicobacter pylori UM298  
TA00478 AapA4 Helicobacter pylori UM299  
TA00409 AapA4 Helicobacter pylori Shi112  
TA00220 AapA4 Helicobacter pylori F32 DNA  
TA00226 AapA4 Helicobacter pylori F57 DNA  
TA00468 AapA3 Helicobacter pylori UM066  
TA00090 AapA4 Helicobacter pylori 51  
TA00100 AapA4 Helicobacter pylori 83  
TA00485 AapA4 Helicobacter pylori v225d  
TA00470 AapA4 Helicobacter pylori UM066  
TA00095 AapA4 Helicobacter pylori 52  
TA00135 AapA4 Helicobacter pylori Aklavik117  
TA00148 AapA3 Helicobacter pylori B38 B38.  
TA00320 AapA3 Helicobacter pylori oki102  
TA00327 AapA3 Helicobacter pylori oki112  
TA00339 AapA3 Helicobacter pylori oki422  
TA00351 AapA3 Helicobacter pylori oki898  
TA00185 AapA4 Helicobacter pylori BM013A  
TA00265 AapA4 Helicobacter pylori HUP-B14  
TA00182 AapA3 Helicobacter pylori BM013A  
TA00461 AapA3 Helicobacter pylori UM037  
TA00442 AapA4 Helicobacter pylori SouthAfrica7  
TA00449 AapA4 Helicobacter pylori SouthAfrica20  
TA00240 AapA3 Helicobacter pylori Gambia94/24  
TA00245 AapA4 Helicobacter pylori Gambia94/24  
TA00372 AapA4 Helicobacter pylori PeCan18  
TA00434 AapA3 Helicobacter pylori SNT49  
TA00380 AapA4 Helicobacter pylori Punc120  
TA00427 AapA3 Helicobacter pylori SJM180  
TA00089 AapA3 Helicobacter pylori 51  
TA00218 AapA3 Helicobacter pylori F32 DNA  
TA00098 AapA3 Helicobacter pylori 83  
TA00150 AapA4 Helicobacter pylori B38 B38.  
TA00462 AapA4 Helicobacter pylori UM037  
TA00241 AapA3 Helicobacter pylori Gambia94/24  
TA00256 AapA3 Helicobacter pylori HPAG1  
TA00277 AapA3 Helicobacter pylori J99  
TA00271 AapA3 Helicobacter pylori India7  
TA00201 AapA3 Helicobacter pylori ELS37  
TA00300 AapA3 Helicobacter pylori NY40 DNA  
TA00246 AapA4 Helicobacter pylori Gambia94/24  
TA00373 AapA4 Helicobacter pylori PeCan18  
TA00376 AapA3 Helicobacter pylori PeCan18  
TA00142 AapA4 Helicobacter pylori B8  
TA00287 AapA4 Helicobacter pylori J166  
TA00358 AapA3 Helicobacter pylori P12  
TA00155 AapA3 Helicobacter pylori BM012A  
TA00295 AapA4 Helicobacter pylori Lithuania75  
TA00235 AapA4 Helicobacter pylori G27  
TA00269 AapA4 Helicobacter pylori India7  
TA00435 AapA4 Helicobacter pylori SNT49  
TA00141 AapA4 Helicobacter pylori B8  
TA00288 AapA4 Helicobacter pylori J166  
TA00137 AapA3 Helicobacter pylori B8  
TA00285 AapA3 Helicobacter pylori J166  
TA00043 AapA3 Helicobacter cetorum MIT 00-7128  
TA00044 AapA3 Helicobacter cetorum MIT 00-7128  
TA00421 AapA5 Helicobacter pylori SJM180  
TA00038 AapA3 Helicobacter cetorum MIT 00-7128  
TA00056 AapA3 Helicobacter cetorum MIT 99-5656  
TA00040 AapA3 Helicobacter cetorum MIT 00-7128  
TA00060 AapA3 Helicobacter cetorum MIT 99-5656  
TA00071 AapA3 Helicobacter cetorum MIT 99-5656  
TA00067 AapA3 Helicobacter cetorum MIT 99-5656  
TA00093 AapA3 Helicobacter pylori 52  
TA00209 AapA4 Helicobacter pylori F16 DNA  
TA00251 AapA4 Helicobacter pylori Hp238  
TA00314 AapA3 Helicobacter pylori OK310 DNA  
TA00195 AapA3 Helicobacter pylori Cuz20  
TA00383 AapA3 Helicobacter pylori Punc135  
TA00415 AapA3 Helicobacter pylori Shi417  
TA00402 AapA3 Helicobacter pylori Sat464  
TA00379 AapA3 Helicobacter pylori Punc120  
TA00303 AapA4 Helicobacter pylori NY40 DNA  
TA00419 AapA3 Helicobacter pylori Shi470  
TA00420 AapA4 Helicobacter pylori Shi470  
TA00490 AapA4 Helicobacter pylori XZ274  
TA00159 AapA4 Helicobacter pylori BM012A  
TA00296 AapA4 Helicobacter pylori Lithuania75  
TA00232 AapA3 Helicobacter pylori G27  
TA00353 AapA4 Helicobacter pylori oki898  
TA00204 AapA4 Helicobacter pylori ELS37  
TA00257 AapA4 Helicobacter pylori HPAG1  
TA00362 AapA4 Helicobacter pylori P12  
TA00262 AapA3 Helicobacter pylori HUP-B14  
TA00276 AapA3 Helicobacter pylori J99  
TA00322 AapA4 Helicobacter pylori oki102  
TA00329 AapA4 Helicobacter pylori oki112  
TA00341 AapA4 Helicobacter pylori oki422  
TA00259 AapA5 Helicobacter pylori HUP-B14  
TA00281 AapA4 Helicobacter pylori J99  
TA00272 AapA5 Helicobacter pylori J99  
TA00367 AapA5 Helicobacter pylori PeCan18  
TA00107 AapA4 Helicobacter pylori 908  
TA00247 AapA4 Helicobacter pylori Gambia94/24  
TA00430 AapA4 Helicobacter pylori SJM180  
TA00443 AapA4 Helicobacter pylori SouthAfrica7

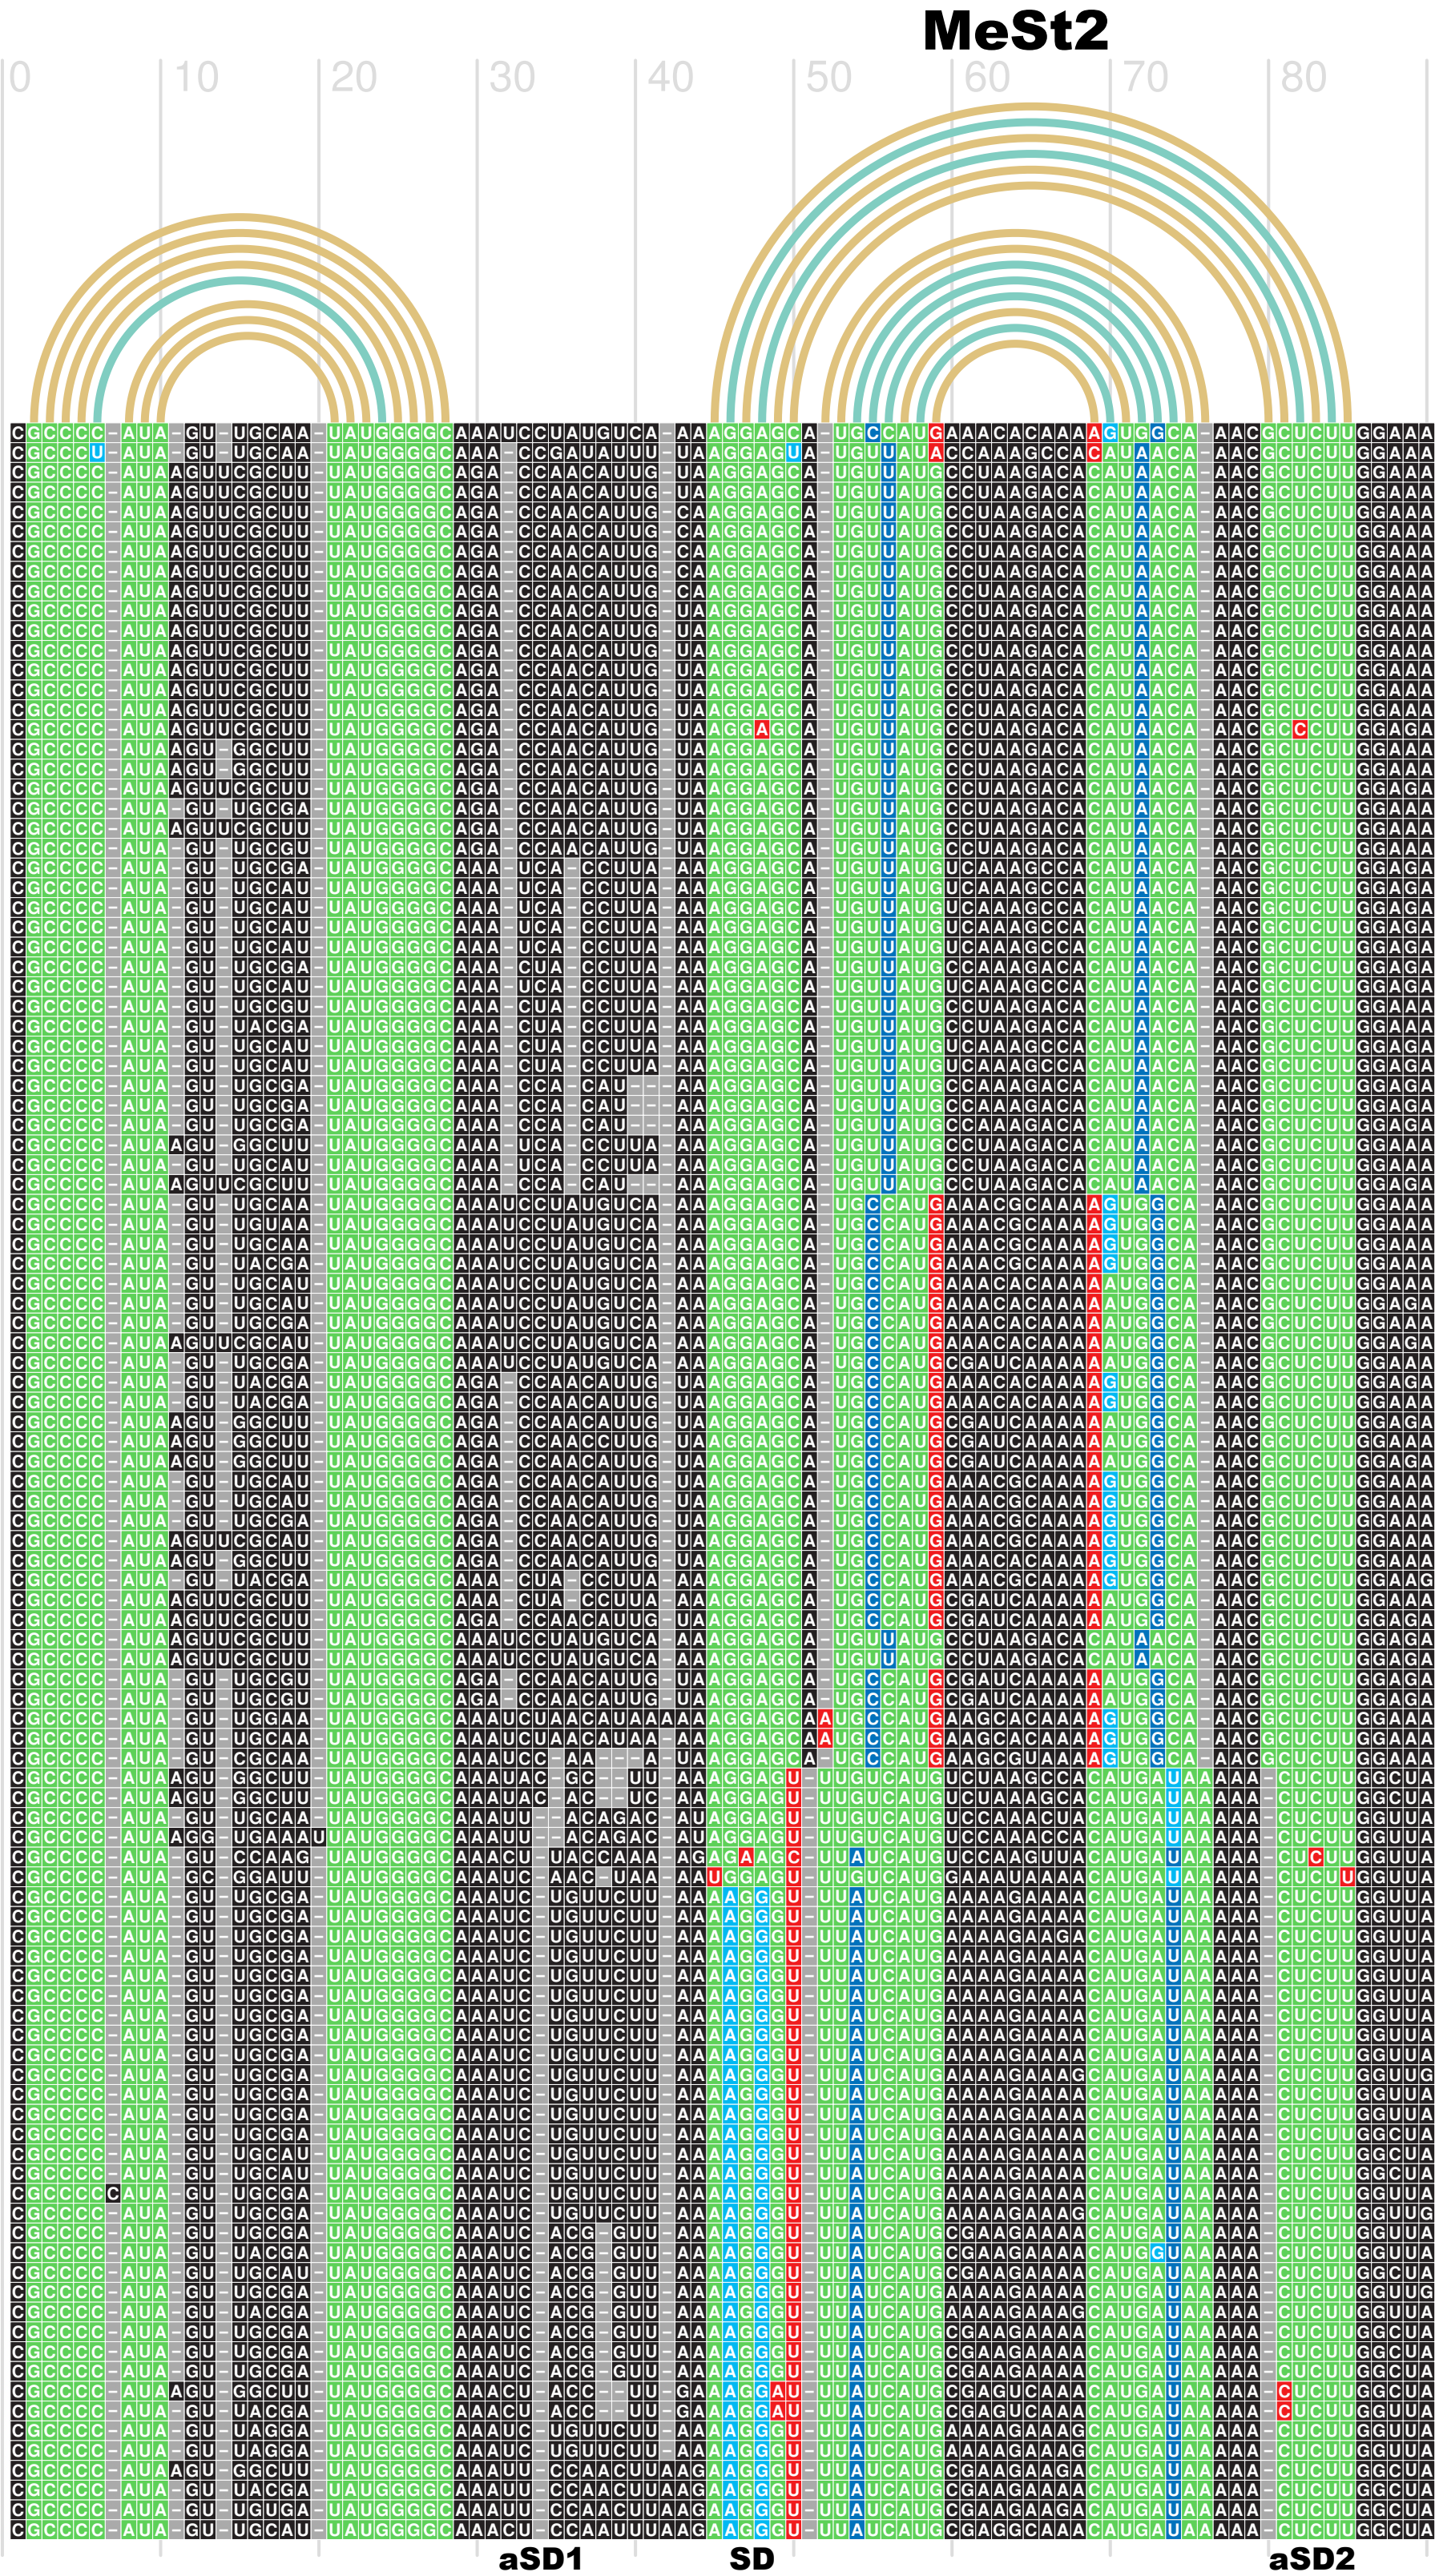

■ Conservation ■ Covariation ■ One-sided ■ Invalid ■ Unpaired ■ Gap
