# Supplementary figures and images for: A genetic selection reveals functional metastable structures embedded in a toxin-encoding mRNA
Source: eLife journal article supplement (doi:10.7554/elife.47549), 2019-08-14

# Metastable structure 1 (~45 nt)

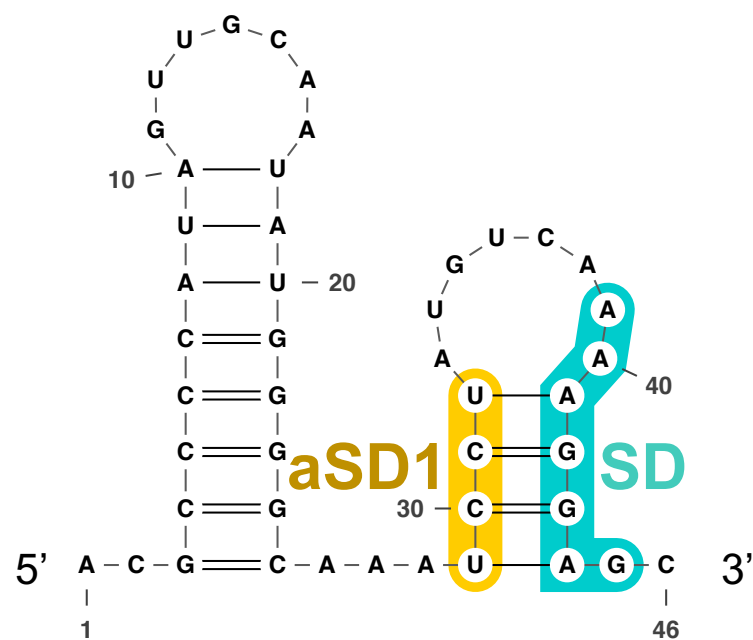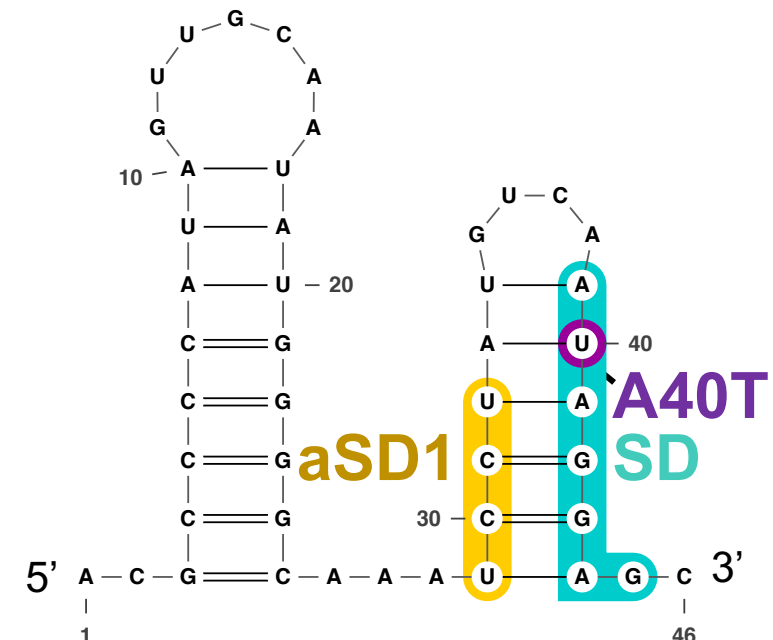

# Metastable structure 2 (~80 nt)

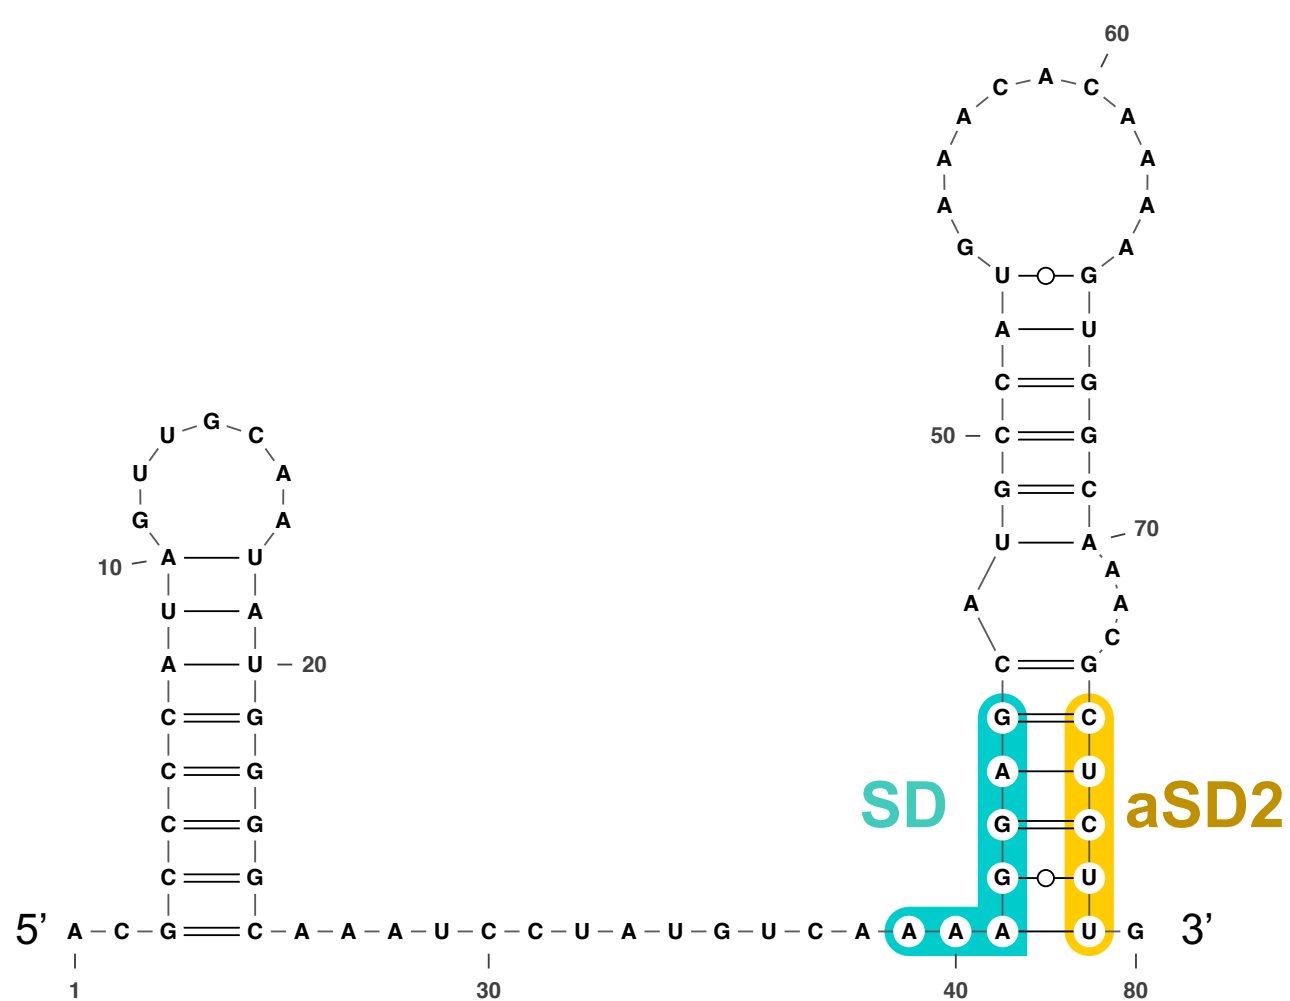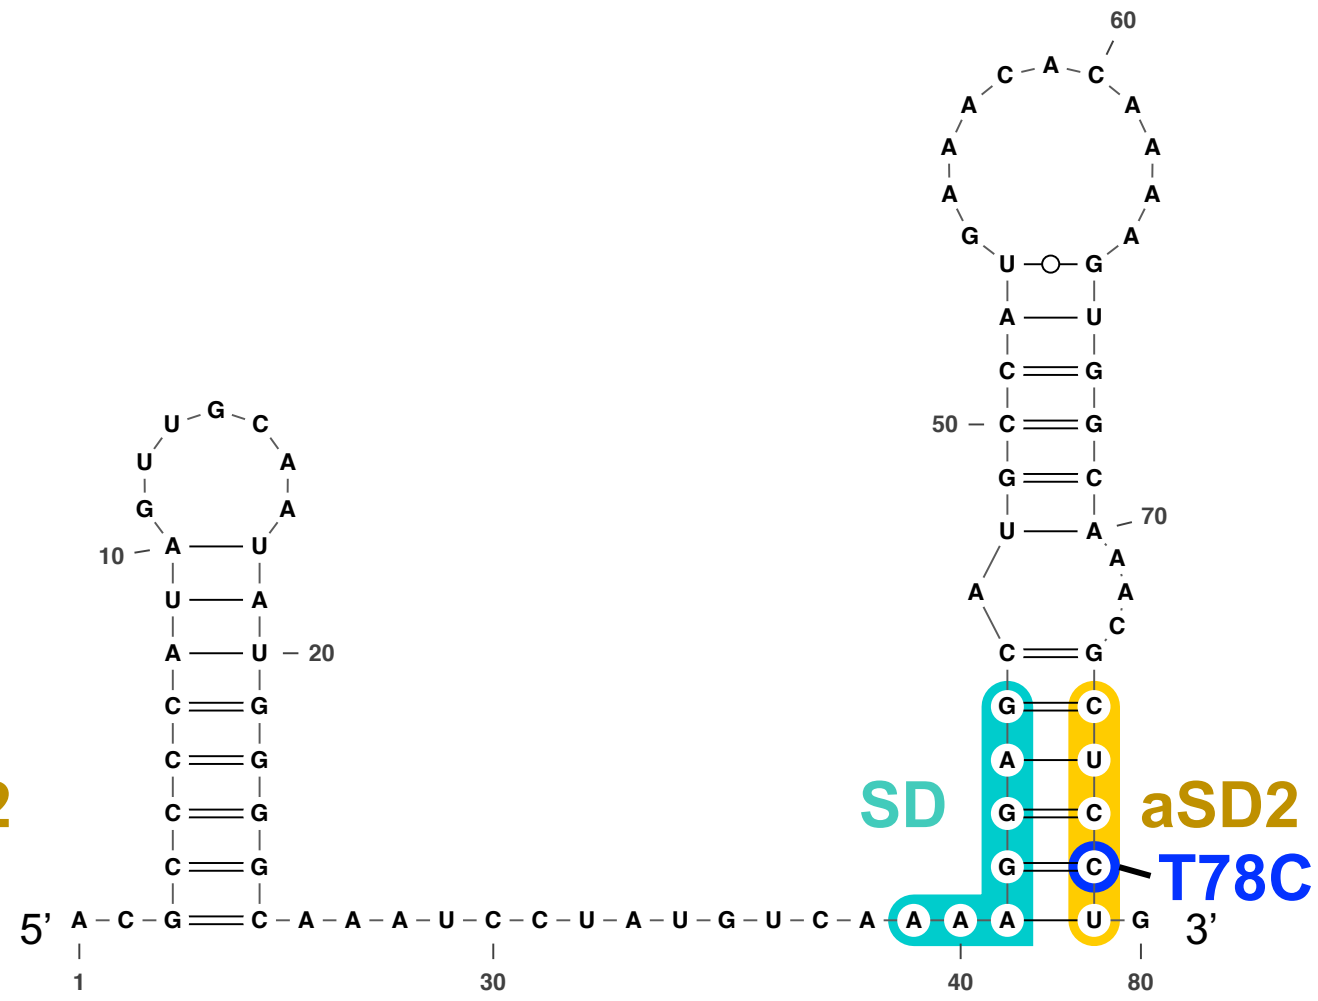

Figure 7 – figure supplement 2

Supplement: supp [file elife-47549-supp-v1.zip]

Figure 8 - figure supplement 1A

Covariation

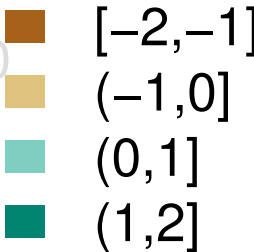

Metastable structure 1

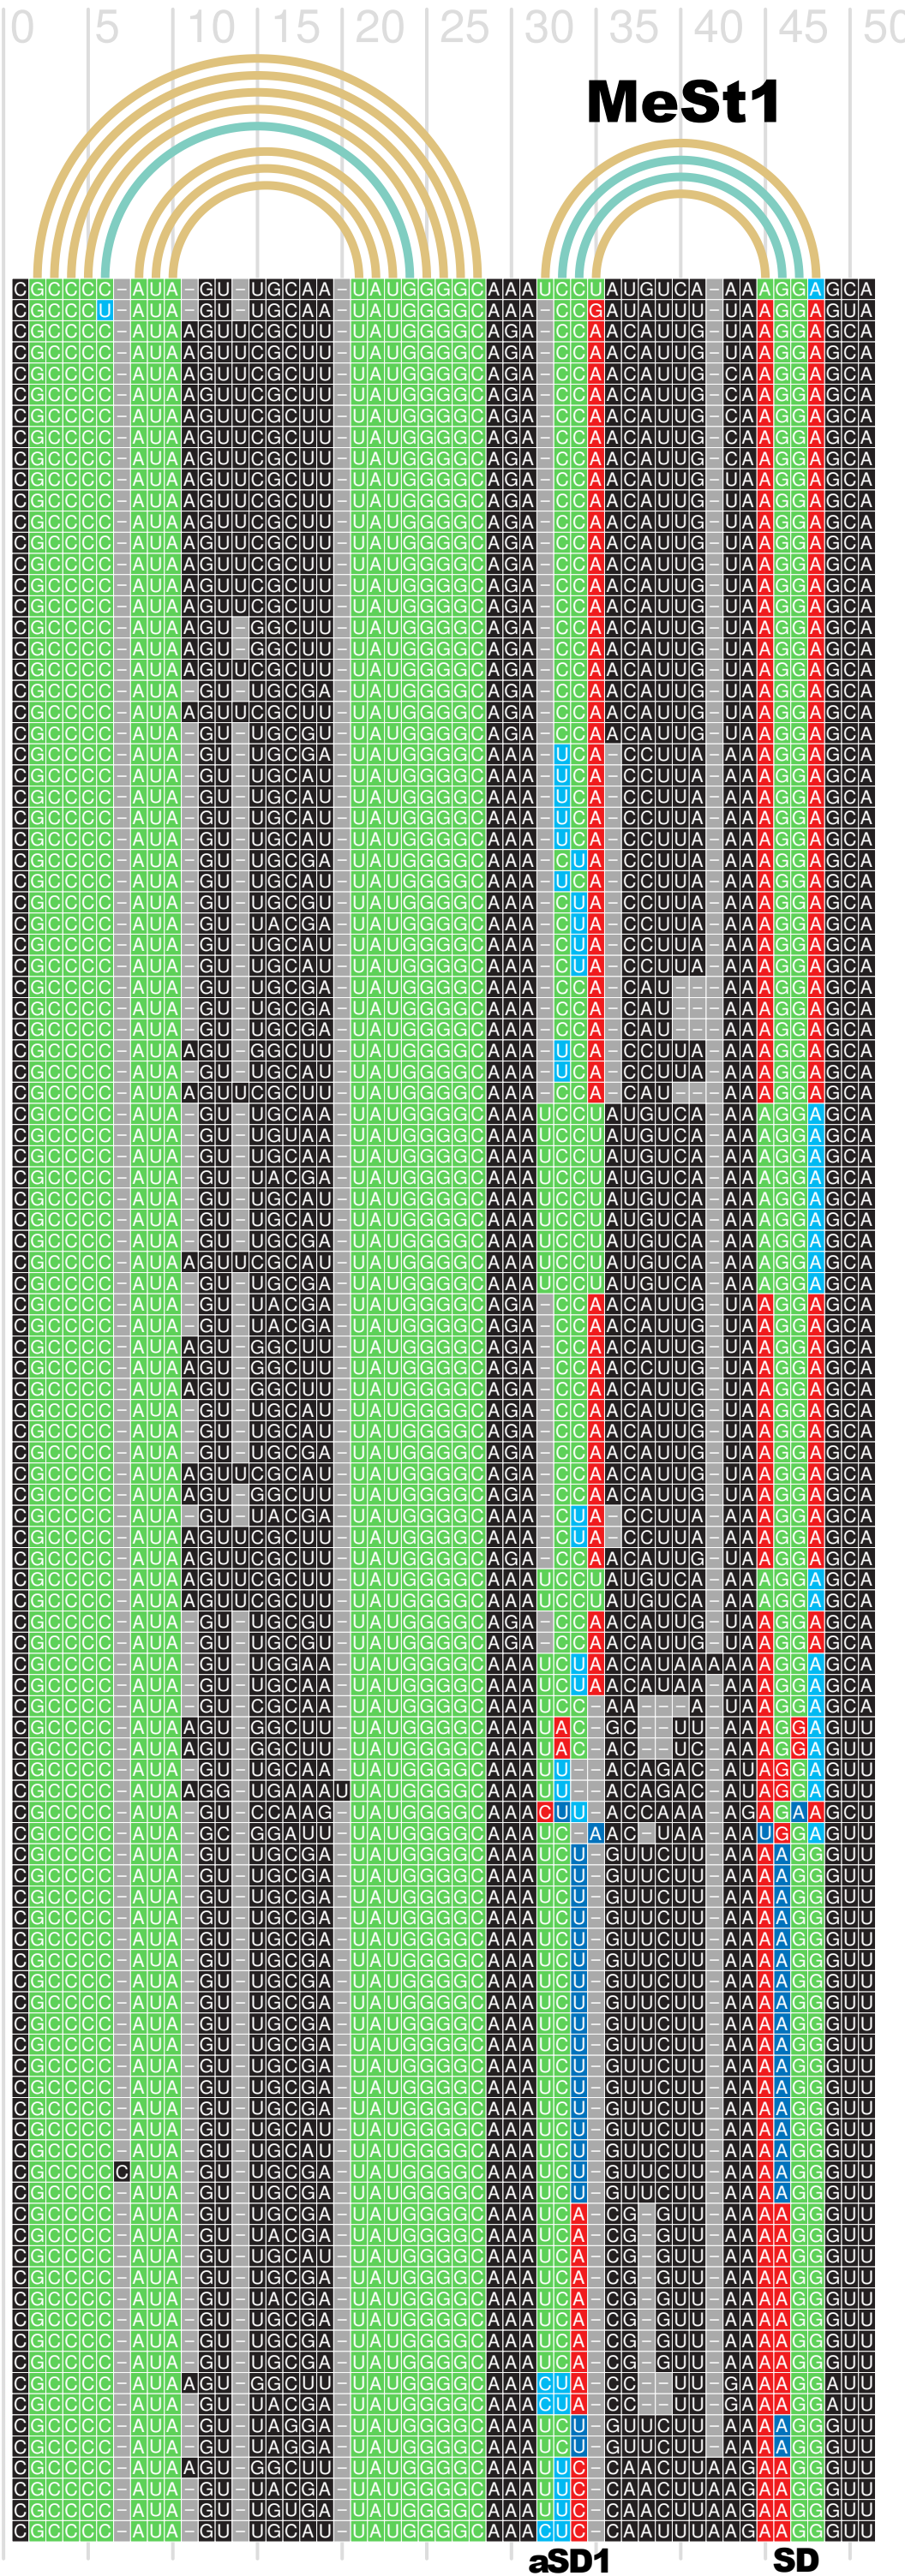

Supplement: supp [file elife-47549-supp-v1.zip]

Figure 1 - figure supplement 1

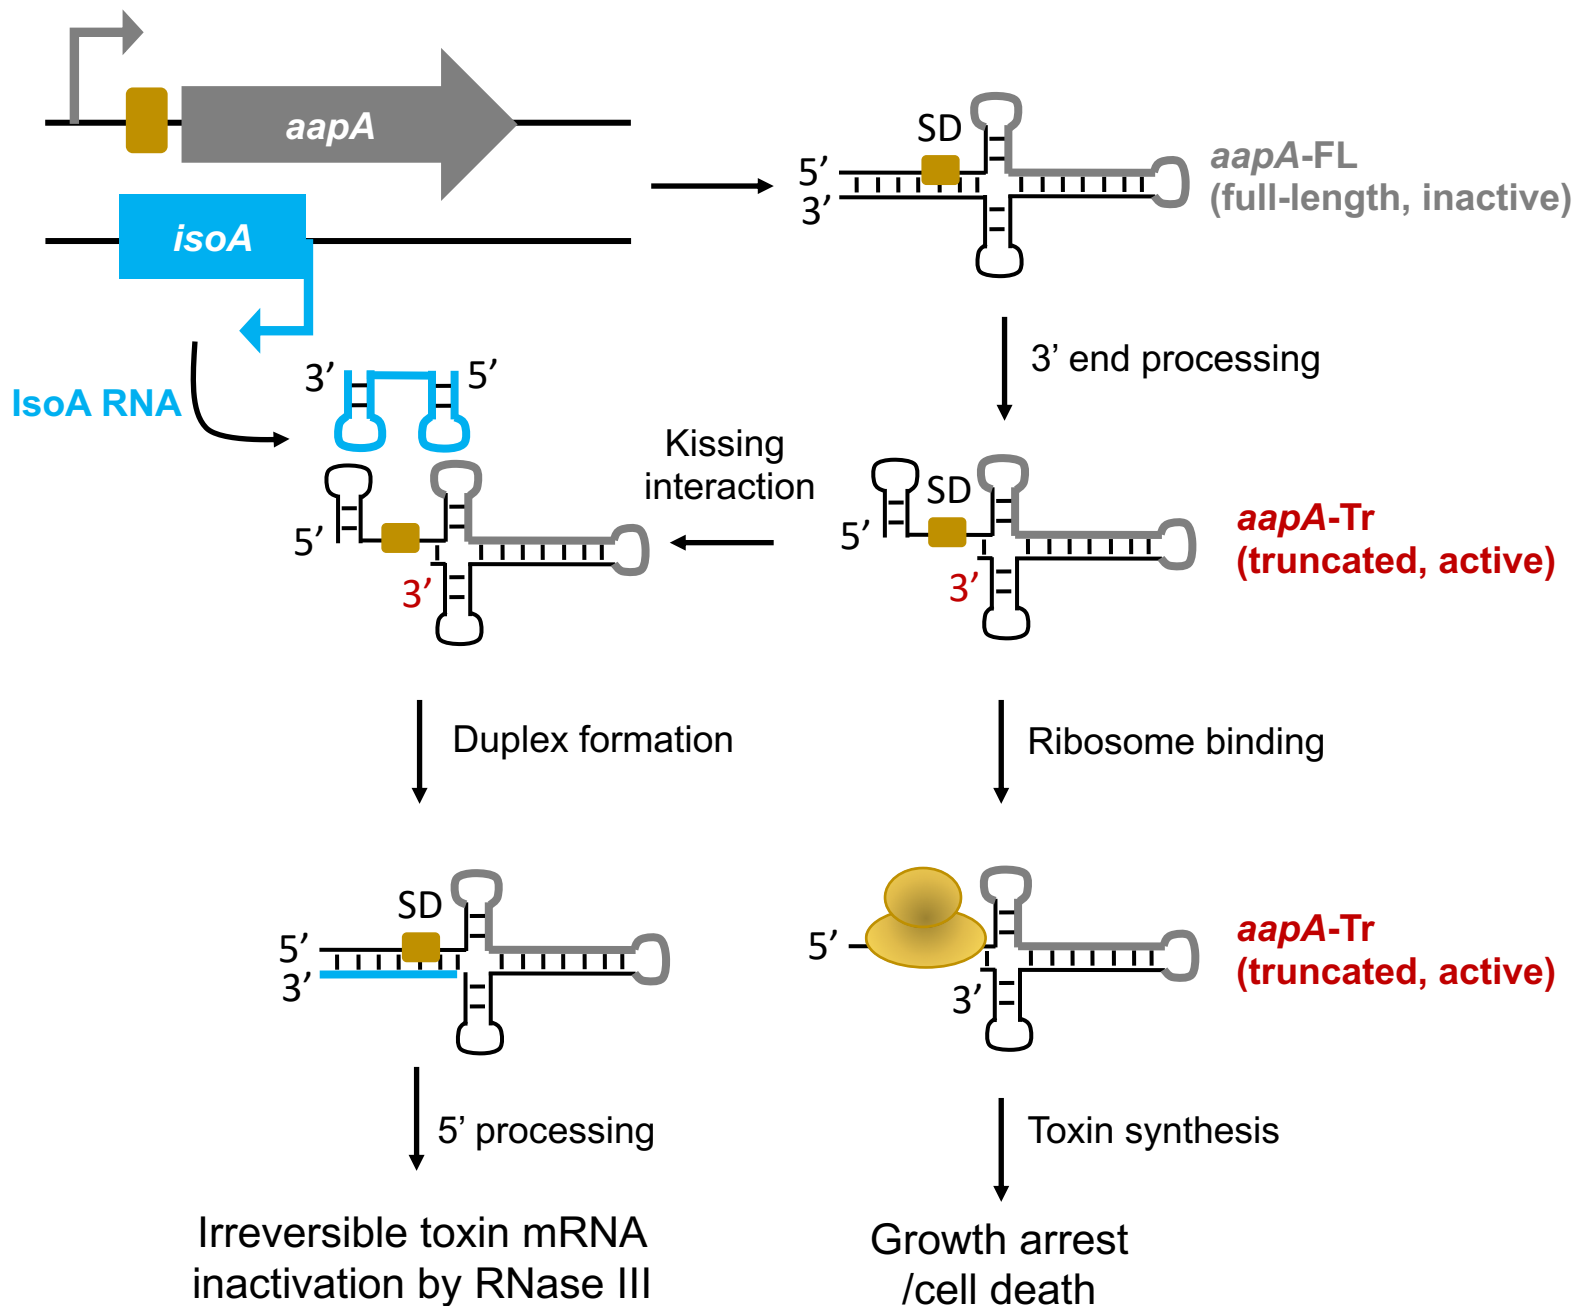

Supplement: supp [file elife-47549-supp-v1.zip]

**A**

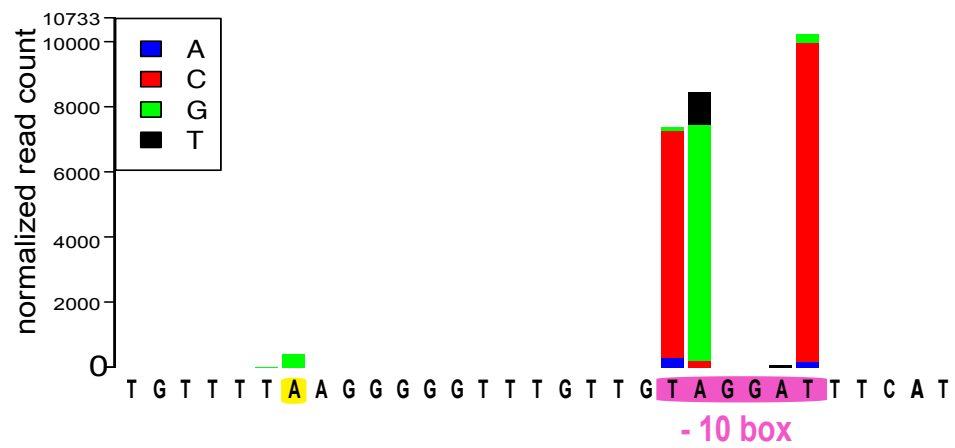

**B**

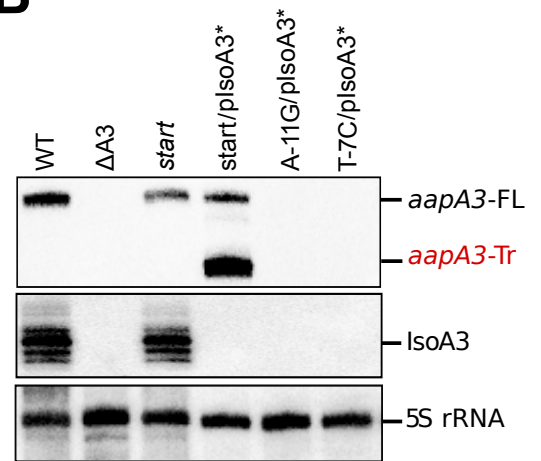

**Figure 3 - figure supplement 2**

Supplement: supp [file elife-47549-supp-v1.zip]

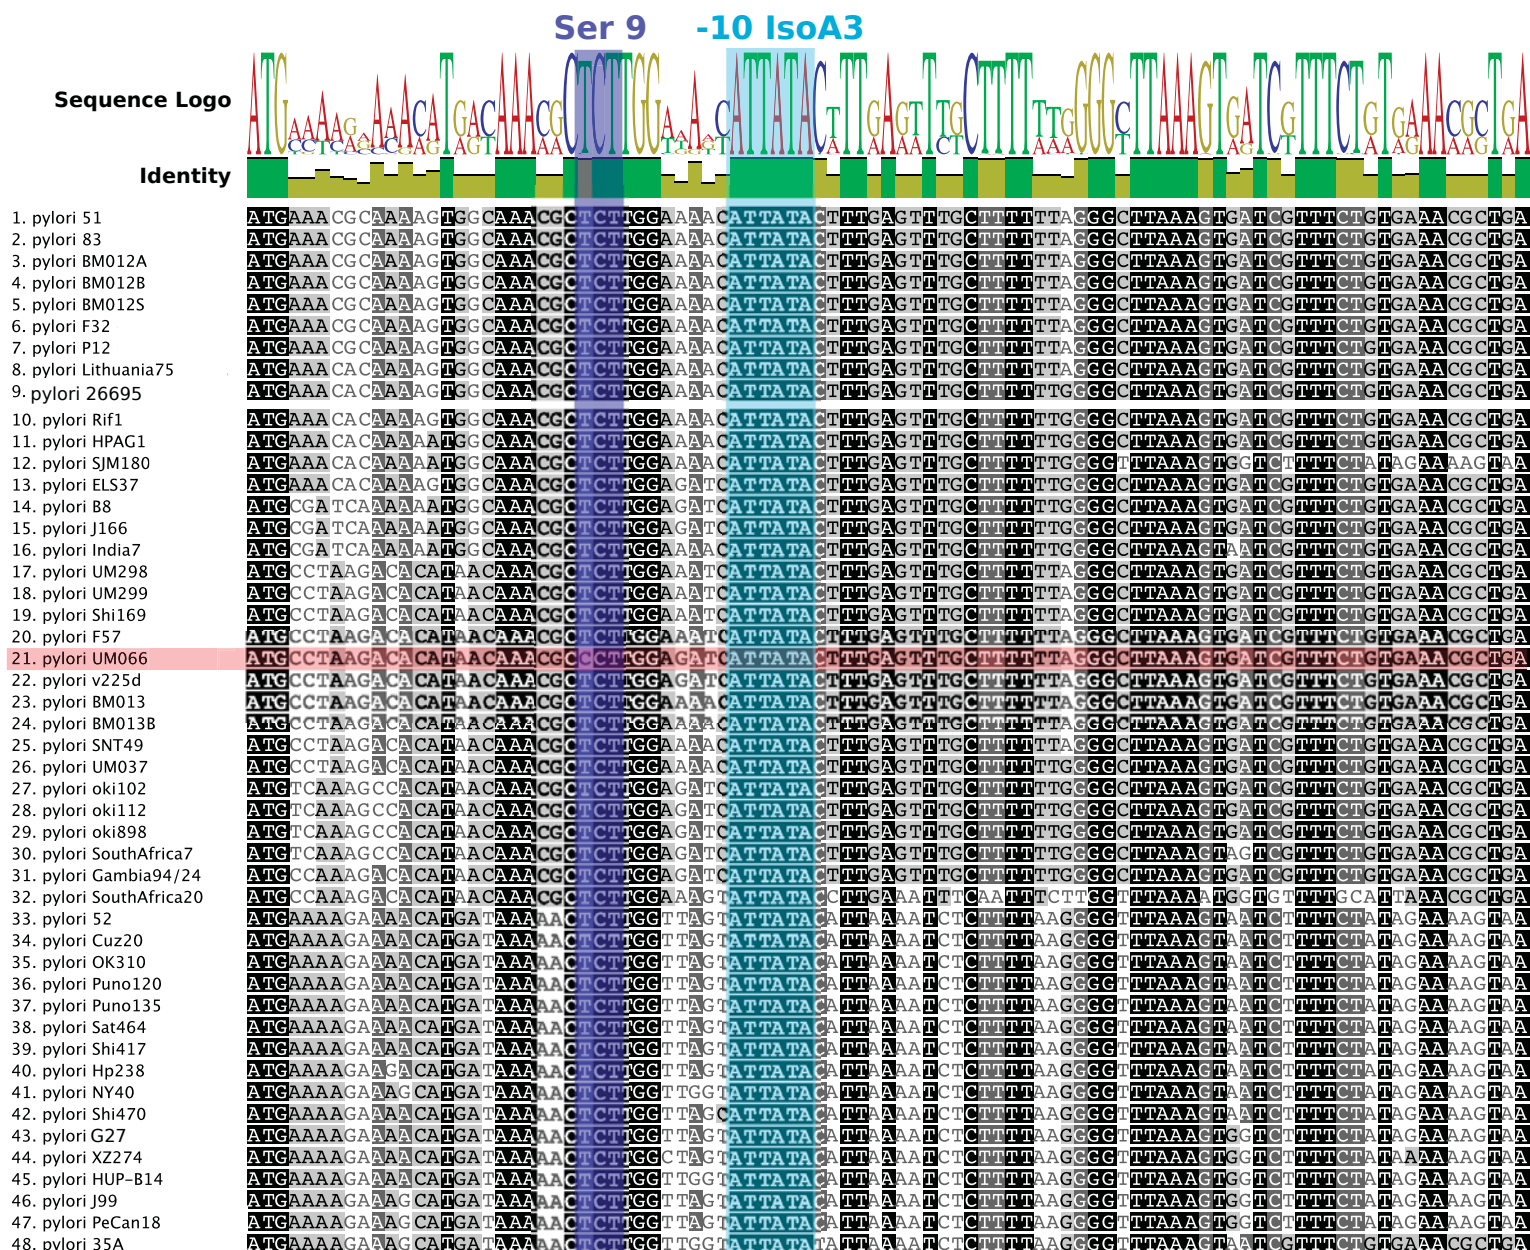

**Figure 6 - figure supplement 2**

Supplement: supp [file elife-47549-supp-v1.zip]
